# Supplementary material
Source: PubMed Central journal article supplement (PMC2779134)
Supplement: supp_122_23_4363__2.pdf [file supp_122_23_4363__2.pdf]

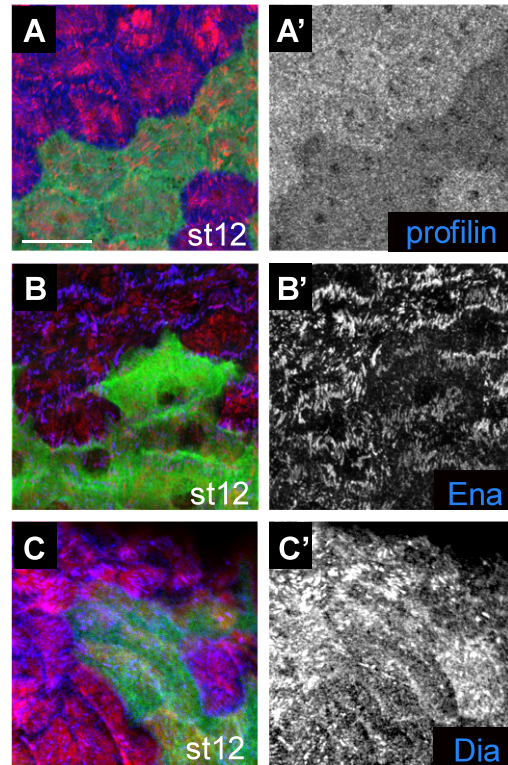

**Figure S2.  $\alpha$ PS1 $\beta$ PS mediates the downregulation of actin nucleating factors**  
All micrographs show clones of cells lacking  $\alpha$ PS1 marked by the absence of GFP (no green) at stage 12. A-C show the merge of channels for actin (red), GFP (green) and different actin nucleating proteins (blue), also shown in grey (A'-C'). As in the absence of  $\beta$ PS (Figure 4), profilin (A-A'), Enabled (B-B') and Diaphanous (C-C') were elevated in the absence of  $\alpha$ PS1. Scale bar, 20 $\mu$ m.
