# Supplementary material
Source: PubMed Central journal article supplement (PMC2779134)
Supplement: supp_122_23_4363__3.pdf [file supp_122_23_4363__3.pdf]

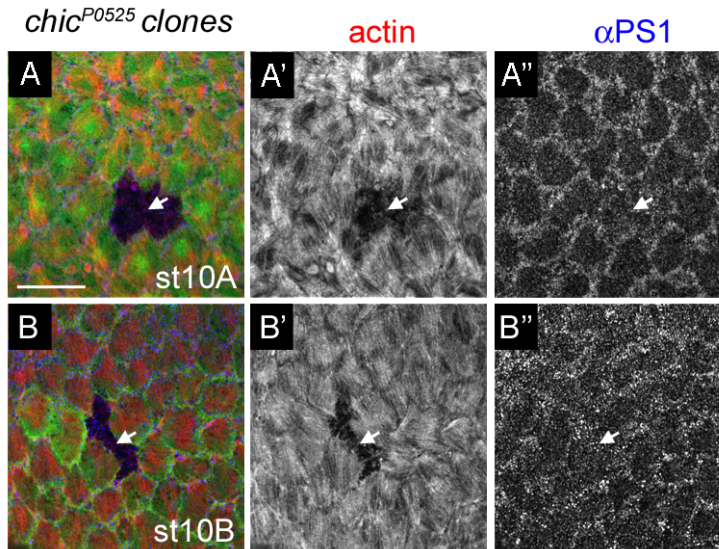

**Figure S3.  $\alpha$ PS1 $\beta$ PS is still present in cells lacking profilin**  
Clones lacking profilin (*chic*[P0525] no green) stained for actin (red) and  $\alpha$ PS1 (blue) at stages 10A (A-A'') and 10B (B-B'') (only small clones can be obtained). Cells lacking profilin did not have basal actin (A', B') but retained normal levels of  $\alpha$ PS1, which were no longer organised into clear focal adhesions at the edges of the cell (arrows A'', B''). Scale bar, 20 $\mu$ m.
